# Supplementary material for: Clinical and laboratory characteristics of clozapine-treated patients with schizophrenia referred to a national immunodeficiency clinic reveals a B-cell signature resembling common variable immunodeficiency (CVID)
Source: PubMed Central journal article supplement (PMC7476264; doi:10.1136/jclinpath-2019-206235), 2020-02-24
Supplement: jclinpath-2019-206235supp001.pdf [file jclinpath-2019-206235supp001.pdf]

| ID | Primarily reported in UK Family | Infection history | Antibiotype | Mechanism | Onset/protection | Secondary diagnosis of endophthalmitis | Recurrent infections (8 or more A&S and per year, or 4 infections related otherwise) | First case | Age at infection | Onset/signs (months) | Visaged (months) | Calculated titers | IgG tU/L | IgA tU/L | IgM tU/L | HB IgG tU/L | HB IgA tU/L | HB IgM tU/L | Vitreous results | HB IgG Post treatment tU/L | HB IgA Post treatment tU/L | HB IgM Post treatment tU/L | RBCs x10 <sup>6</sup> /µL | WBCs x10 <sup>3</sup> /µL | CRP1 mg/L | CRP2 mg/L | CRP3 mg/L | CRP4 mg/L | CRP5 mg/L | CRP6 mg/L | ESR mm/h | ESR2 mm/h | ESR3 mm/h | ESR4 mm/h | ESR5 mm/h | ESR6 mm/h | ESR7 mm/h | ESR8 mm/h | ESR9 mm/h | ESR10 mm/h | ESR11 mm/h | ESR12 mm/h | ESR13 mm/h | ESR14 mm/h | ESR15 mm/h | ESR16 mm/h | ESR17 mm/h | ESR18 mm/h | ESR19 mm/h | ESR20 mm/h | ESR21 mm/h | ESR22 mm/h | ESR23 mm/h | ESR24 mm/h | ESR25 mm/h | ESR26 mm/h | ESR27 mm/h | ESR28 mm/h | ESR29 mm/h | ESR30 mm/h | ESR31 mm/h | ESR32 mm/h | ESR33 mm/h | ESR34 mm/h | ESR35 mm/h | ESR36 mm/h | ESR37 mm/h | ESR38 mm/h | ESR39 mm/h | ESR40 mm/h | ESR41 mm/h | ESR42 mm/h | ESR43 mm/h | ESR44 mm/h | ESR45 mm/h | ESR46 mm/h | ESR47 mm/h | ESR48 mm/h | ESR49 mm/h | ESR50 mm/h | ESR51 mm/h | ESR52 mm/h | ESR53 mm/h | ESR54 mm/h | ESR55 mm/h | ESR56 mm/h | ESR57 mm/h | ESR58 mm/h | ESR59 mm/h | ESR60 mm/h | ESR61 mm/h | ESR62 mm/h | ESR63 mm/h | ESR64 mm/h | ESR65 mm/h | ESR66 mm/h | ESR67 mm/h | ESR68 mm/h | ESR69 mm/h | ESR70 mm/h | ESR71 mm/h | ESR72 mm/h | ESR73 mm/h | ESR74 mm/h | ESR75 mm/h | ESR76 mm/h | ESR77 mm/h | ESR78 mm/h | ESR79 mm/h | ESR80 mm/h | ESR81 mm/h | ESR82 mm/h | ESR83 mm/h | ESR84 mm/h | ESR85 mm/h | ESR86 mm/h | ESR87 mm/h | ESR88 mm/h | ESR89 mm/h | ESR90 mm/h | ESR91 mm/h | ESR92 mm/h | ESR93 mm/h | ESR94 mm/h | ESR95 mm/h | ESR96 mm/h | ESR97 mm/h | ESR98 mm/h | ESR99 mm/h | ESR100 mm/h | ESR101 mm/h | ESR102 mm/h | ESR103 mm/h | ESR104 mm/h | ESR105 mm/h | ESR106 mm/h | ESR107 mm/h | ESR108 mm/h | ESR109 mm/h | ESR110 mm/h | ESR111 mm/h | ESR112 mm/h | ESR113 mm/h | ESR114 mm/h | ESR115 mm/h | ESR116 mm/h | ESR117 mm/h | ESR118 mm/h | ESR119 mm/h | ESR120 mm/h | ESR121 mm/h | ESR122 mm/h | ESR123 mm/h | ESR124 mm/h | ESR125 mm/h | ESR126 mm/h | ESR127 mm/h | ESR128 mm/h | ESR129 mm/h | ESR130 mm/h | ESR131 mm/h | ESR132 mm/h | ESR133 mm/h | ESR134 mm/h | ESR135 mm/h | ESR136 mm/h | ESR137 mm/h | ESR138 mm/h | ESR139 mm/h | ESR140 mm/h | ESR141 mm/h | ESR142 mm/h | ESR143 mm/h | ESR144 mm/h | ESR145 mm/h | ESR146 mm/h | ESR147 mm/h | ESR148 mm/h | ESR149 mm/h | ESR150 mm/h | ESR151 mm/h | ESR152 mm/h | ESR153 mm/h | ESR154 mm/h | ESR155 mm/h | ESR156 mm/h | ESR157 mm/h | ESR158 mm/h | ESR159 mm/h | ESR160 mm/h | ESR161 mm/h | ESR162 mm/h | ESR163 mm/h | ESR164 mm/h | ESR165 mm/h | ESR166 mm/h | ESR167 mm/h | ESR168 mm/h | ESR169 mm/h | ESR170 mm/h | ESR171 mm/h | ESR172 mm/h | ESR173 mm/h | ESR174 mm/h | ESR175 mm/h | ESR176 mm/h | ESR177 mm/h | ESR178 mm/h | ESR179 mm/h | ESR180 mm/h | ESR181 mm/h | ESR182 mm/h | ESR183 mm/h | ESR184 mm/h | ESR185 mm/h | ESR186 mm/h | ESR187 mm/h | ESR188 mm/h | ESR189 mm/h | ESR190 mm/h | ESR191 mm/h | ESR192 mm/h | ESR193 mm/h | ESR194 mm/h | ESR195 mm/h | ESR196 mm/h | ESR197 mm/h | ESR198 mm/h | ESR199 mm/h | ESR200 mm/h | ESR201 mm/h | ESR202 mm/h | ESR203 mm/h | ESR204 mm/h | ESR205 mm/h | ESR206 mm/h | ESR207 mm/h | ESR208 mm/h | ESR209 mm/h | ESR210 mm/h | ESR211 mm/h | ESR212 mm/h | ESR213 mm/h | ESR214 mm/h | ESR215 mm/h | ESR216 mm/h | ESR217 mm/h | ESR218 mm/h | ESR219 mm/h | ESR220 mm/h | ESR221 mm/h | ESR222 mm/h | ESR223 mm/h | ESR224 mm/h | ESR225 mm/h | ESR226 mm/h | ESR227 mm/h | ESR228 mm/h | ESR229 mm/h | ESR230 mm/h | ESR231 mm/h | ESR232 mm/h | ESR233 mm/h | ESR234 mm/h | ESR235 mm/h | ESR236 mm/h | ESR237 mm/h | ESR238 mm/h | ESR239 mm/h | ESR240 mm/h | ESR241 mm/h | ESR242 mm/h | ESR243 mm/h | ESR244 mm/h | ESR245 mm/h | ESR246 mm/h | ESR247 mm/h | ESR248 mm/h | ESR249 mm/h | ESR250 mm/h | ESR251 mm/h | ESR252 mm/h | ESR253 mm/h | ESR254 mm/h | ESR255 mm/h | ESR256 mm/h | ESR257 mm/h | ESR258 mm/h | ESR259 mm/h | ESR260 mm/h | ESR261 mm/h | ESR262 mm/h | ESR263 mm/h | ESR264 mm/h | ESR265 mm/h | ESR266 mm/h | ESR267 mm/h | ESR268 mm/h | ESR269 mm/h | ESR270 mm/h | ESR271 mm/h | ESR272 mm/h | ESR273 mm/h | ESR274 mm/h | ESR275 mm/h | ESR276 mm/h | ESR277 mm/h | ESR278 mm/h | ESR279 mm/h | ESR280 mm/h | ESR281 mm/h | ESR282 mm/h | ESR283 mm/h | ESR284 mm/h | ESR285 mm/h | ESR286 mm/h | ESR287 mm/h | ESR288 mm/h | ESR289 mm/h | ESR290 mm/h | ESR291 mm/h | ESR292 mm/h | ESR293 mm/h | ESR294 mm/h | ESR295 mm/h | ESR296 mm/h | ESR297 mm/h | ESR298 mm/h | ESR299 mm/h | ESR300 mm/h | ESR301 mm/h | ESR302 mm/h | ESR303 mm/h | ESR304 mm/h | ESR305 mm/h | ESR306 mm/h | ESR307 mm/h | ESR308 mm/h | ESR309 mm/h | ESR310 mm/h | ESR311 mm/h | ESR312 mm/h | ESR313 mm/h | ESR314 mm/h | ESR315 mm/h | ESR316 mm/h | ESR317 mm/h | ESR318 mm/h | ESR319 mm/h | ESR320 mm/h | ESR321 mm/h | ESR322 mm/h | ESR323 mm/h | ESR324 mm/h | ESR325 mm/h | ESR326 mm/h | ESR327 mm/h | ESR328 mm/h | ESR329 mm/h | ESR330 mm/h | ESR331 mm/h | ESR332 mm/h | ESR333 mm/h | ESR334 mm/h | ESR335 mm/h | ESR336 mm/h | ESR337 mm/h | ESR338 mm/h | ESR339 mm/h | ESR340 mm/h | ESR341 mm/h | ESR342 mm/h | ESR343 mm/h | ESR344 mm/h | ESR345 mm/h | ESR346 mm/h | ESR347 mm/h | ESR348 mm/h | ESR349 mm/h | ESR350 mm/h | ESR351 mm/h | ESR352 mm/h | ESR353 mm/h | ESR354 mm/h | ESR355 mm/h | ESR356 mm/h | ESR357 mm/h | ESR358 mm/h | ESR359 mm/h | ESR360 mm/h | ESR361 mm/h | ESR362 mm/h | ESR363 mm/h | ESR364 mm/h | ESR365 mm/h | ESR366 mm/h | ESR367 mm/h | ESR368 mm/h | ESR369 mm/h | ESR370 mm/h | ESR371 mm/h | ESR372 mm/h | ESR373 mm/h | ESR374 mm/h | ESR375 mm/h | ESR376 mm/h | ESR377 mm/h | ESR378 mm/h | ESR379 mm/h | ESR380 mm/h | ESR381 mm/h | ESR382 mm/h | ESR383 mm/h | ESR384 mm/h | ESR385 mm/h | ESR386 mm/h | ESR387 mm/h | ESR388 mm/h | ESR389 mm/h | ESR390 mm/h | ESR391 mm/h | ESR392 mm/h | ESR393 mm/h | ESR394 mm/h | ESR395 mm/h | ESR396 mm/h | ESR397 mm/h | ESR398 mm/h | ESR399 mm/h | ESR400 mm/h | ESR401 mm/h | ESR402 mm/h | ESR403 mm/h | ESR404 mm/h | ESR405 mm/h | ESR406 mm/h | ESR407 mm/h | ESR408 mm/h | ESR409 mm/h | ESR410 mm/h | ESR411 mm/h | ESR412 mm/h | ESR413 mm/h | ESR414 mm/h | ESR415 mm/h | ESR416 mm/h | ESR417 mm/h | ESR418 mm/h | ESR419 mm/h | ESR420 mm/h | ESR421 mm/h | ESR422 mm/h | ESR423 mm/h | ESR424 mm/h | ESR425 mm/h | ESR426 mm/h | ESR427 mm/h | ESR428 mm/h | ESR429 mm/h | ESR430 mm/h | ESR431 mm/h | ESR432 mm/h | ESR433 mm/h | ESR434 mm/h | ESR435 mm/h | ESR436 mm/h | ESR437 mm/h | ESR438 mm/h | ESR439 mm/h | ESR440 mm/h | ESR441 mm/h | ESR442 mm/h | ESR443 mm/h | ESR444 mm/h | ESR445 mm/h | ESR446 mm/h | ESR447 mm/h | ESR448 mm/h | ESR449 mm/h | ESR450 mm/h | ESR451 mm/h | ESR452 mm/h | ESR453 mm/h | ESR454 mm/h | ESR455 mm/h | ESR456 mm/h | ESR457 mm/h | ESR458 mm/h | ESR459 mm/h | ESR460 mm/h | ESR461 mm/h | ESR462 mm/h | ESR463 mm/h | ESR464 mm/h | ESR465 mm/h | ESR466 mm/h | ESR467 mm/h | ESR468 mm/h | ESR469 mm/h | ESR470 mm/h | ESR471 mm/h | ESR472 mm/h | ESR473 mm/h | ESR474 mm/h | ESR475 mm/h | ESR476 mm/h | ESR477 mm/h | ESR478 mm/h | ESR479 mm/h | ESR480 mm/h | ESR481 mm/h | ESR482 mm/h | ESR483 mm/h | ESR484 mm/h | ESR485 mm/h | ESR486 mm/h | ESR487 mm/h | ESR488 mm/h | ESR489 mm/h | ESR490 mm/h | ESR491 mm/h | ESR492 mm/h | ESR493 mm/h | ESR494 mm/h | ESR495 mm/h | ESR496 mm/h | ESR497 mm/h | ESR498 mm/h | ESR499 mm/h | ESR500 mm/h | ESR501 mm/h | ESR502 mm/h | ESR503 mm/h | ESR504 mm/h | ESR505 mm/h | ESR506 mm/h | ESR507 mm/h | ESR508 mm/h | ESR509 mm/h | ESR510 mm/h | ESR511 mm/h | ESR512 mm/h | ESR513 mm/h | ESR514 mm/h | ESR515 mm/h | ESR516 mm/h | ESR517 mm/h | ESR518 mm/h | ESR519 mm/h | ESR520 mm/h | ESR521 mm/h | ESR522 mm/h | ESR523 mm/h | ESR524 mm/h | ESR525 mm/h | ESR526 mm/h | ESR527 mm/h | ESR528 mm/h | ESR529 mm/h | ESR530 mm/h | ESR531 mm/h | ESR532 mm/h | ESR533 mm/h | ESR534 mm/h | ESR535 mm/h | ESR536 mm/h | ESR537 mm/h | ESR538 mm/h | ESR539 mm/h | ESR540 mm/h | ESR541 mm/h | ESR542 mm/h | ESR543 mm/h | ESR544 mm/h | ESR545 mm/h | ESR546 mm/h | ESR547 mm/h | ESR548 mm/h | ESR549 mm/h | ESR550 mm/h | ESR551 mm/h | ESR552 mm/h | ESR553 mm/h | ESR554 mm/h | ESR555 mm/h | ESR556 mm/h | ESR557 mm/h | ESR558 mm/h | ESR559 mm/h | ESR560 mm/h | ESR561 mm/h | ESR562 mm/h | ESR563 mm/h | ESR564 mm/h | ESR565 mm/h | ESR566 mm/h | ESR567 mm/h | ESR568 mm/h | ESR569 mm/h | ESR570 mm/h | ESR571 mm/h | ESR572 mm/h | ESR573 mm/h | ESR574 mm/h | ESR575 mm/h | ESR576 mm/h | ESR577 mm/h | ESR578 mm/h | ESR579 mm/h | ESR580 mm/h | ESR581 mm/h | ESR582 mm/h | ESR583 mm/h | ESR584 mm/h | ESR585 mm/h | ESR586 mm/h | ESR587 mm/h | ESR588 mm/h | ESR589 mm/h | ESR590 mm/h | ESR591 mm/h | ESR592 mm/h | ESR593 mm/h | ESR594 mm/h | ESR595 mm/h | ESR596 mm/h | ESR597 mm/h | ESR598 mm/h | ESR599 mm/h | ESR600 mm/h | ESR601 mm/h | ESR602 mm/h | ESR603 mm/h | ESR604 mm/h | ESR605 mm/h | ESR606 mm/h | ESR607 mm/h | ESR608 mm/h | ESR609 mm/h | ESR610 mm/h | ESR611 mm/h | ESR612 mm/h | ESR613 mm/h | ESR614 mm/h | ESR615 mm/h | ESR616 mm/h | ESR617 mm/h | ESR618 mm/h | ESR619 mm/h | ESR620 mm/h | ESR621 mm/h | ESR622 mm/h | ESR623 mm/h | ESR624 mm/h | ESR625 mm/h | ESR626 mm/h | ESR627 mm/h | ESR628 mm/h | ESR629 mm/h | ESR630 mm/h | ESR631 mm/h | ESR632 mm/h | ESR633 mm/h | ESR634 mm/h | ESR635 mm/h | ESR636 mm/h | ESR637 mm/h | ESR638 mm/h | ESR639 mm/h | ESR640 mm/h | ESR641 mm/h | ESR642 mm/h | ESR643 mm/h | ESR644 mm/h | ESR645 mm/h | ESR646 mm/h | ESR647 mm/h | ESR648 mm/h | ESR649 mm/h | ESR650 mm/h | ESR651 mm/h | ESR652 mm/h | ESR653 mm/h | ESR654 mm/h | ESR655 mm/h | ESR656 mm/h | ESR657 mm/h | ESR658 mm/h | ESR659 mm/h | ESR660 mm/h | ESR661 mm/h | ESR662 mm/h | ESR663 mm/h | ESR664 mm/h | ESR665 mm/h | ESR666 mm/h | ESR667 mm/h | ESR668 mm/h | ESR669 mm/h | ESR670 mm/h | ESR671 mm/h | ESR672 mm/h | ESR673 mm/h | ESR674 mm/h | ESR675 mm/h | ESR676 mm/h | ESR677 mm/h | ESR678 mm/h | ESR679 mm/h | ESR680 mm/h | ESR681 mm/h | ESR682 mm/h | ESR683 mm/h | ESR684 mm/h | ESR685 mm/h | ESR686 mm/h | ESR687 mm/h | ESR688 mm/h | ESR689 mm/h | ESR690 mm/h | ESR691 mm/h | ESR692 mm/h | ESR693 mm/h | ESR694 mm/h | ESR695 mm/h | ESR696 mm/h | ESR697 mm/h | ESR698 mm/h | ESR699 mm/h | ESR700 mm/h | ESR701 mm/h | ESR702 mm/h | ESR703 mm/h | ESR704 mm/h | ESR705 mm/h | ESR706 mm/h | ESR707 mm/h | ESR708 mm/h | ESR709 mm/h | ESR710 mm/h | ESR711 mm/h | ESR712 mm/h | ESR713 mm/h | ESR714 mm/h | ESR715 mm/h | ESR716 mm/h | ESR717 mm/h | ESR718 mm/h | ESR719 mm/h | ESR720 mm/h | ESR721 mm/h | ESR722 mm/h | ESR723 mm/h | ESR724 mm/h | ESR725 mm/h | ESR726 mm/h | ESR727 mm/h | ESR728 mm/h | ESR729 mm/h | ESR730 mm/h | ESR731 mm/h | ESR732 mm/h | ESR733 mm/h | ESR734 mm/h | ESR735 mm/h | ESR736 mm/h | ESR737 mm/h | ESR738 mm/h | ESR739 mm/h | ESR740 mm/h |
|----|---------------------------------|-------------------|-------------|-----------|------------------|----------------------------------------|--------------------------------------------------------------------------------------|------------|------------------|----------------------|------------------|-------------------|----------|----------|----------|-------------|-------------|-------------|------------------|----------------------------|----------------------------|----------------------------|---------------------------|---------------------------|-----------|-----------|-----------|-----------|-----------|-----------|----------|-----------|-----------|-----------|-----------|-----------|-----------|-----------|-----------|------------|------------|------------|------------|------------|------------|------------|------------|------------|------------|------------|------------|------------|------------|------------|------------|------------|------------|------------|------------|------------|------------|------------|------------|------------|------------|------------|------------|------------|------------|------------|------------|------------|------------|------------|------------|------------|------------|------------|------------|------------|------------|------------|------------|------------|------------|------------|------------|------------|------------|------------|------------|------------|------------|------------|------------|------------|------------|------------|------------|------------|------------|------------|------------|------------|------------|------------|------------|------------|------------|------------|------------|------------|------------|------------|------------|------------|------------|------------|------------|------------|------------|------------|------------|------------|------------|------------|------------|------------|------------|-------------|-------------|-------------|-------------|-------------|-------------|-------------|-------------|-------------|-------------|-------------|-------------|-------------|-------------|-------------|-------------|-------------|-------------|-------------|-------------|-------------|-------------|-------------|-------------|-------------|-------------|-------------|-------------|-------------|-------------|-------------|-------------|-------------|-------------|-------------|-------------|-------------|-------------|-------------|-------------|-------------|-------------|-------------|-------------|-------------|-------------|-------------|-------------|-------------|-------------|-------------|-------------|-------------|-------------|-------------|-------------|-------------|-------------|-------------|-------------|-------------|-------------|-------------|-------------|-------------|-------------|-------------|-------------|-------------|-------------|-------------|-------------|-------------|-------------|-------------|-------------|-------------|-------------|-------------|-------------|-------------|-------------|-------------|-------------|-------------|-------------|-------------|-------------|-------------|-------------|-------------|-------------|-------------|-------------|-------------|-------------|-------------|-------------|-------------|-------------|-------------|-------------|-------------|-------------|-------------|-------------|-------------|-------------|-------------|-------------|-------------|-------------|-------------|-------------|-------------|-------------|-------------|-------------|-------------|-------------|-------------|-------------|-------------|-------------|-------------|-------------|-------------|-------------|-------------|-------------|-------------|-------------|-------------|-------------|-------------|-------------|-------------|-------------|-------------|-------------|-------------|-------------|-------------|-------------|-------------|-------------|-------------|-------------|-------------|-------------|-------------|-------------|-------------|-------------|-------------|-------------|-------------|-------------|-------------|-------------|-------------|-------------|-------------|-------------|-------------|-------------|-------------|-------------|-------------|-------------|-------------|-------------|-------------|-------------|-------------|-------------|-------------|-------------|-------------|-------------|-------------|-------------|-------------|-------------|-------------|-------------|-------------|-------------|-------------|-------------|-------------|-------------|-------------|-------------|-------------|-------------|-------------|-------------|-------------|-------------|-------------|-------------|-------------|-------------|-------------|-------------|-------------|-------------|-------------|-------------|-------------|-------------|-------------|-------------|-------------|-------------|-------------|-------------|-------------|-------------|-------------|-------------|-------------|-------------|-------------|-------------|-------------|-------------|-------------|-------------|-------------|-------------|-------------|-------------|-------------|-------------|-------------|-------------|-------------|-------------|-------------|-------------|-------------|-------------|-------------|-------------|-------------|-------------|-------------|-------------|-------------|-------------|-------------|-------------|-------------|-------------|-------------|-------------|-------------|-------------|-------------|-------------|-------------|-------------|-------------|-------------|-------------|-------------|-------------|-------------|-------------|-------------|-------------|-------------|-------------|-------------|-------------|-------------|-------------|-------------|-------------|-------------|-------------|-------------|-------------|-------------|-------------|-------------|-------------|-------------|-------------|-------------|-------------|-------------|-------------|-------------|-------------|-------------|-------------|-------------|-------------|-------------|-------------|-------------|-------------|-------------|-------------|-------------|-------------|-------------|-------------|-------------|-------------|-------------|-------------|-------------|-------------|-------------|-------------|-------------|-------------|-------------|-------------|-------------|-------------|-------------|-------------|-------------|-------------|-------------|-------------|-------------|-------------|-------------|-------------|-------------|-------------|-------------|-------------|-------------|-------------|-------------|-------------|-------------|-------------|-------------|-------------|-------------|-------------|-------------|-------------|-------------|-------------|-------------|-------------|-------------|-------------|-------------|-------------|-------------|-------------|-------------|-------------|-------------|-------------|-------------|-------------|-------------|-------------|-------------|-------------|-------------|-------------|-------------|-------------|-------------|-------------|-------------|-------------|-------------|-------------|-------------|-------------|-------------|-------------|-------------|-------------|-------------|-------------|-------------|-------------|-------------|-------------|-------------|-------------|-------------|-------------|-------------|-------------|-------------|-------------|-------------|-------------|-------------|-------------|-------------|-------------|-------------|-------------|-------------|-------------|-------------|-------------|-------------|-------------|-------------|-------------|-------------|-------------|-------------|-------------|-------------|-------------|-------------|-------------|-------------|-------------|-------------|-------------|-------------|-------------|-------------|-------------|-------------|-------------|-------------|-------------|-------------|-------------|-------------|-------------|-------------|-------------|-------------|-------------|-------------|-------------|-------------|-------------|-------------|-------------|-------------|-------------|-------------|-------------|-------------|-------------|-------------|-------------|-------------|-------------|-------------|-------------|-------------|-------------|-------------|-------------|-------------|-------------|-------------|-------------|-------------|-------------|-------------|-------------|-------------|-------------|-------------|-------------|-------------|-------------|-------------|-------------|-------------|-------------|-------------|-------------|-------------|-------------|-------------|-------------|-------------|-------------|-------------|-------------|-------------|-------------|-------------|-------------|-------------|-------------|-------------|-------------|-------------|-------------|-------------|-------------|-------------|-------------|-------------|-------------|-------------|-------------|-------------|-------------|-------------|-------------|-------------|-------------|-------------|-------------|-------------|-------------|-------------|-------------|-------------|-------------|-------------|-------------|-------------|-------------|-------------|-------------|-------------|-------------|-------------|-------------|-------------|-------------|-------------|-------------|-------------|-------------|-------------|-------------|-------------|-------------|-------------|-------------|-------------|-------------|-------------|-------------|-------------|-------------|-------------|-------------|-------------|-------------|-------------|-------------|-------------|-------------|-------------|-------------|-------------|-------------|-------------|-------------|-------------|-------------|-------------|-------------|-------------|-------------|-------------|-------------|-------------|-------------|-------------|-------------|-------------|-------------|-------------|-------------|-------------|-------------|-------------|-------------|-------------|-------------|-------------|-------------|-------------|-------------|-------------|-------------|-------------|-------------|-------------|-------------|-------------|-------------|-------------|-------------|-------------|-------------|-------------|-------------|-------------|-------------|-------------|-------------|-------------|-------------|-------------|-------------|-------------|-------------|-------------|-------------|-------------|-------------|-------------|-------------|-------------|-------------|-------------|-------------|-------------|-------------|-------------|-------------|-------------|-------------|-------------|-------------|-------------|-------------|-------------|-------------|
|----|---------------------------------|-------------------|-------------|-----------|------------------|----------------------------------------|--------------------------------------------------------------------------------------|------------|------------------|----------------------|------------------|-------------------|----------|----------|----------|-------------|-------------|-------------|------------------|----------------------------|----------------------------|----------------------------|---------------------------|---------------------------|-----------|-----------|-----------|-----------|-----------|-----------|----------|-----------|-----------|-----------|-----------|-----------|-----------|-----------|-----------|------------|------------|------------|------------|------------|------------|------------|------------|------------|------------|------------|------------|------------|------------|------------|------------|------------|------------|------------|------------|------------|------------|------------|------------|------------|------------|------------|------------|------------|------------|------------|------------|------------|------------|------------|------------|------------|------------|------------|------------|------------|------------|------------|------------|------------|------------|------------|------------|------------|------------|------------|------------|------------|------------|------------|------------|------------|------------|------------|------------|------------|------------|------------|------------|------------|------------|------------|------------|------------|------------|------------|------------|------------|------------|------------|------------|------------|------------|------------|------------|------------|------------|------------|------------|------------|------------|------------|------------|------------|------------|-------------|-------------|-------------|-------------|-------------|-------------|-------------|-------------|-------------|-------------|-------------|-------------|-------------|-------------|-------------|-------------|-------------|-------------|-------------|-------------|-------------|-------------|-------------|-------------|-------------|-------------|-------------|-------------|-------------|-------------|-------------|-------------|-------------|-------------|-------------|-------------|-------------|-------------|-------------|-------------|-------------|-------------|-------------|-------------|-------------|-------------|-------------|-------------|-------------|-------------|-------------|-------------|-------------|-------------|-------------|-------------|-------------|-------------|-------------|-------------|-------------|-------------|-------------|-------------|-------------|-------------|-------------|-------------|-------------|-------------|-------------|-------------|-------------|-------------|-------------|-------------|-------------|-------------|-------------|-------------|-------------|-------------|-------------|-------------|-------------|-------------|-------------|-------------|-------------|-------------|-------------|-------------|-------------|-------------|-------------|-------------|-------------|-------------|-------------|-------------|-------------|-------------|-------------|-------------|-------------|-------------|-------------|-------------|-------------|-------------|-------------|-------------|-------------|-------------|-------------|-------------|-------------|-------------|-------------|-------------|-------------|-------------|-------------|-------------|-------------|-------------|-------------|-------------|-------------|-------------|-------------|-------------|-------------|-------------|-------------|-------------|-------------|-------------|-------------|-------------|-------------|-------------|-------------|-------------|-------------|-------------|-------------|-------------|-------------|-------------|-------------|-------------|-------------|-------------|-------------|-------------|-------------|-------------|-------------|-------------|-------------|-------------|-------------|-------------|-------------|-------------|-------------|-------------|-------------|-------------|-------------|-------------|-------------|-------------|-------------|-------------|-------------|-------------|-------------|-------------|-------------|-------------|-------------|-------------|-------------|-------------|-------------|-------------|-------------|-------------|-------------|-------------|-------------|-------------|-------------|-------------|-------------|-------------|-------------|-------------|-------------|-------------|-------------|-------------|-------------|-------------|-------------|-------------|-------------|-------------|-------------|-------------|-------------|-------------|-------------|-------------|-------------|-------------|-------------|-------------|-------------|-------------|-------------|-------------|-------------|-------------|-------------|-------------|-------------|-------------|-------------|-------------|-------------|-------------|-------------|-------------|-------------|-------------|-------------|-------------|-------------|-------------|-------------|-------------|-------------|-------------|-------------|-------------|-------------|-------------|-------------|-------------|-------------|-------------|-------------|-------------|-------------|-------------|-------------|-------------|-------------|-------------|-------------|-------------|-------------|-------------|-------------|-------------|-------------|-------------|-------------|-------------|-------------|-------------|-------------|-------------|-------------|-------------|-------------|-------------|-------------|-------------|-------------|-------------|-------------|-------------|-------------|-------------|-------------|-------------|-------------|-------------|-------------|-------------|-------------|-------------|-------------|-------------|-------------|-------------|-------------|-------------|-------------|-------------|-------------|-------------|-------------|-------------|-------------|-------------|-------------|-------------|-------------|-------------|-------------|-------------|-------------|-------------|-------------|-------------|-------------|-------------|-------------|-------------|-------------|-------------|-------------|-------------|-------------|-------------|-------------|-------------|-------------|-------------|-------------|-------------|-------------|-------------|-------------|-------------|-------------|-------------|-------------|-------------|-------------|-------------|-------------|-------------|-------------|-------------|-------------|-------------|-------------|-------------|-------------|-------------|-------------|-------------|-------------|-------------|-------------|-------------|-------------|-------------|-------------|-------------|-------------|-------------|-------------|-------------|-------------|-------------|-------------|-------------|-------------|-------------|-------------|-------------|-------------|-------------|-------------|-------------|-------------|-------------|-------------|-------------|-------------|-------------|-------------|-------------|-------------|-------------|-------------|-------------|-------------|-------------|-------------|-------------|-------------|-------------|-------------|-------------|-------------|-------------|-------------|-------------|-------------|-------------|-------------|-------------|-------------|-------------|-------------|-------------|-------------|-------------|-------------|-------------|-------------|-------------|-------------|-------------|-------------|-------------|-------------|-------------|-------------|-------------|-------------|-------------|-------------|-------------|-------------|-------------|-------------|-------------|-------------|-------------|-------------|-------------|-------------|-------------|-------------|-------------|-------------|-------------|-------------|-------------|-------------|-------------|-------------|-------------|-------------|-------------|-------------|-------------|-------------|-------------|-------------|-------------|-------------|-------------|-------------|-------------|-------------|-------------|-------------|-------------|-------------|-------------|-------------|-------------|-------------|-------------|-------------|-------------|-------------|-------------|-------------|-------------|-------------|-------------|-------------|-------------|-------------|-------------|-------------|-------------|-------------|-------------|-------------|-------------|-------------|-------------|-------------|-------------|-------------|-------------|-------------|-------------|-------------|-------------|-------------|-------------|-------------|-------------|-------------|-------------|-------------|-------------|-------------|-------------|-------------|-------------|-------------|-------------|-------------|-------------|-------------|-------------|-------------|-------------|-------------|-------------|-------------|-------------|-------------|-------------|-------------|-------------|-------------|-------------|-------------|-------------|-------------|-------------|-------------|-------------|-------------|-------------|-------------|-------------|-------------|-------------|-------------|-------------|-------------|-------------|-------------|-------------|-------------|-------------|-------------|-------------|-------------|-------------|-------------|-------------|-------------|-------------|-------------|-------------|-------------|-------------|-------------|-------------|-------------|-------------|-------------|-------------|-------------|-------------|-------------|-------------|-------------|-------------|-------------|-------------|-------------|-------------|-------------|-------------|-------------|-------------|-------------|-------------|-------------|-------------|-------------|-------------|-------------|-------------|-------------|-------------|-------------|-------------|-------------|-------------|-------------|-------------|-------------|-------------|-------------|-------------|-------------|-------------|-------------|-------------|-------------|-------------|-------------|-------------|-------------|-------------|-------------|-------------|-------------|-------------|-------------|-------------|-------------|-------------|-------------|-------------|-------------|-------------|-------------|-------------|-------------|-------------|-------------|-------------|-------------|-------------|-------------|-------------|-------------|-------------|-------------|-------------|-------------|
