# Supplementary material for: Clinical and laboratory characteristics of clozapine-treated patients with schizophrenia referred to a national immunodeficiency clinic reveals a B-cell signature resembling common variable immunodeficiency (CVID)
Source: PubMed Central journal article supplement (PMC7476264; doi:10.1136/jclinpath-2019-206235), 2020-02-24

**Supplementary Figure, S3: Vaccine specific-IgG response assessment**

See text and supplementary S1 for details.

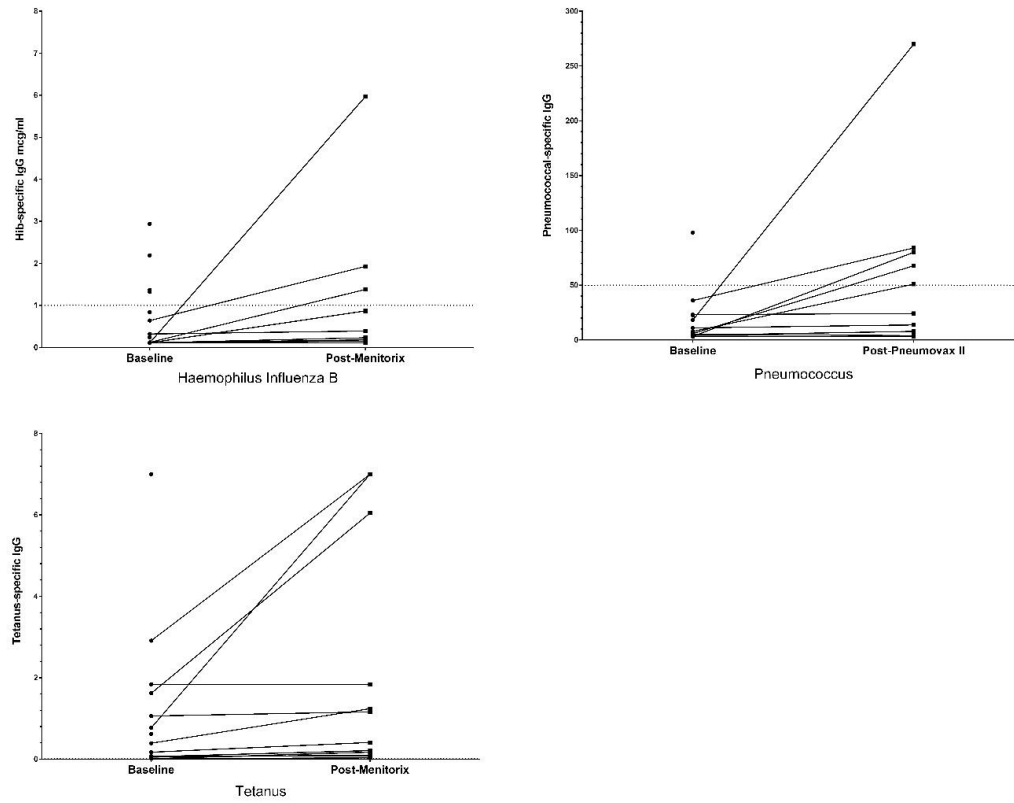

**Supplementary S4:** Decline in class-switched memory B-cell populations in individuals receiving clozapine is not readily explained by ageing.

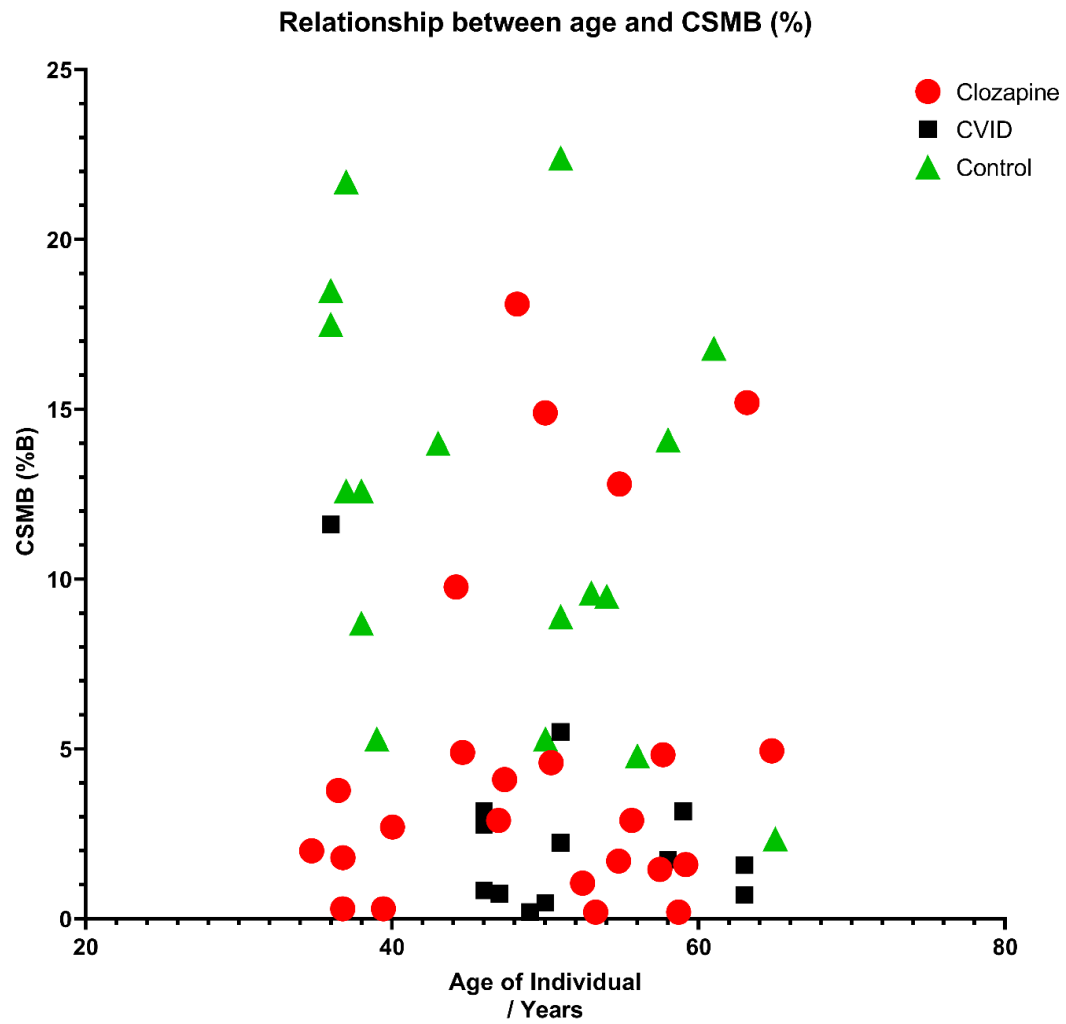

### Supplementary, S5: Cumulative Referrals to ICW with a diagnosis of schizophrenia in relation to introduction of calculated globulin screening.

The national calculated globulin screening programme was setup during 2014, with roll-out complete across all health boards by November 2014. Consequently, any adult liver function test with low calculated globulin triggers the laboratory comment “*Low calculated globulin may represent antibody deficiency. Consider immunoglobulins if there is a history of infections*”.

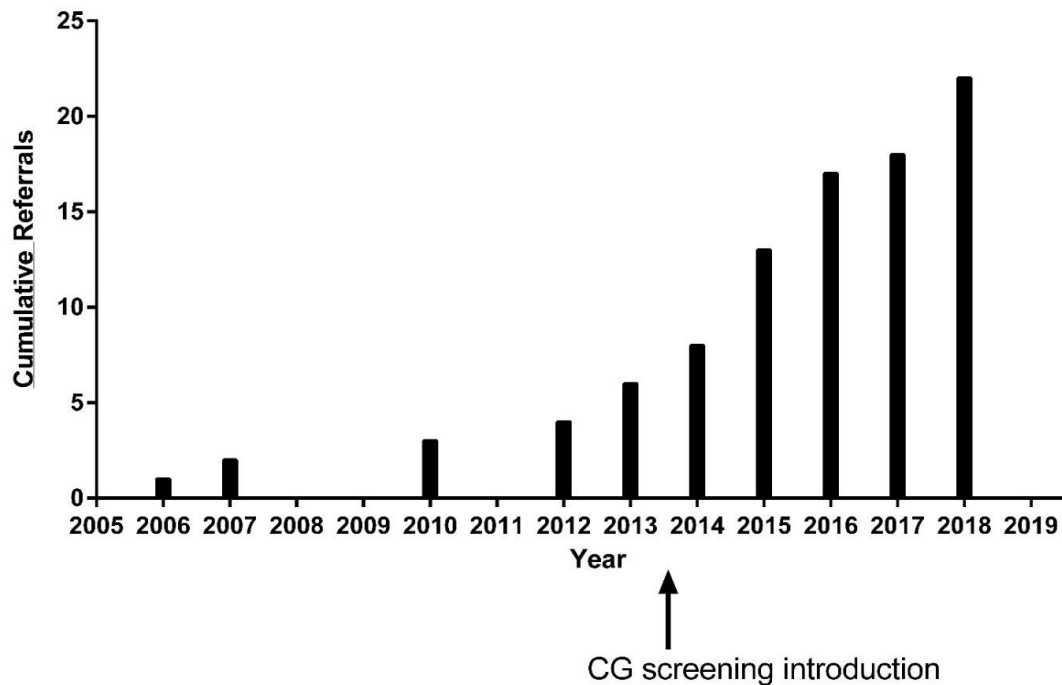

Supplement: jclinpath-2019-206235supp003.pdf [file jclinpath-2019-206235supp003.pdf]
